# Supplementary material for: Antitubercular, Cytotoxicity, and Computational Target Validation of Dihydroquinazolinone Derivatives
Source: MDPI journal article supplement (doi:10.3390/antibiotics11070831), 2022-06-21
Supplement: s1 [file s1]

# Antitubercular, Cytotoxicity, and Computational Target Validation of Dihydroquinazolinone Derivatives

Katharigatta N. Venugopala <sup>1,2,\*</sup>, Nizar A. Al-Shar'I <sup>3</sup>, Lina A. Dahabiyeh <sup>4</sup>, Wafa Hourani <sup>5</sup>, Pran Kishore Deb <sup>5,\*</sup>, Melendhran Pillay <sup>6</sup>, Bashaer Abu-Irmaileh <sup>7</sup>, Yasser Bustanji <sup>7,8</sup>, Sandeep Chandrashekharappa <sup>9</sup>, Christophe Tratat <sup>1</sup>, Mahesh Attimarad <sup>1</sup>, Anroop B. Nair <sup>1</sup>, Nagaraja Sreeharsha <sup>1,10</sup>, Pottathil Shinu <sup>11</sup>, Michelyne Haroun <sup>1</sup>, Mahmoud Kandeel <sup>12,13</sup>, Abdulmalek Ahmed Balgoname <sup>1</sup>, Rashmi Venugopala <sup>14</sup> and Mohamed A. Morsy <sup>1,15</sup>

<sup>1</sup> Department of Pharmaceutical Sciences, College of Clinical Pharmacy, King Faisal University, Al-Ahsa 31982, Saudi Arabia; ctratat@kfu.edu.sa (C.T.); mattimarad@kfu.edu.sa (M.A.); anair@kfu.edu.sa (A.B.N.); sharsha@kfu.edu.sa (N.S.); mharoun@kfu.edu.sa (M.H.); abalgoname@kfu.edu.sa (A.A.B.); momorsy@kfu.edu.sa (M.A.M.)

<sup>2</sup> Department of Biotechnology and Food Science, Faculty of Applied Sciences, Durban University of Technology, Durban 4000, South Africa

<sup>3</sup> Department of Medicinal Chemistry and Pharmacognosy, Faculty of Pharmacy, Jordan University of Science and Technology, P.O. Box 3030, Irbid, 22110, Jordan; nashari@just.edu.jo (N.A.A.-I.)

<sup>4</sup> Department of Pharmaceutical Sciences, School of Pharmacy, The University of Jordan, 11942 Amman, Jordan; l.dahabiyeh@ju.edu.jo (L.A.D.)

<sup>5</sup> Department of Pharmaceutical Sciences, Faculty of Pharmacy, Philadelphia University, Amman 19392, Jordan; wafa.hourani@hotmail.com (W.H.)

<sup>6</sup> Department of Microbiology, National Health Laboratory Services, KZN Academic Complex, Inkosi Albert Luthuli Central Hospital, Durban 4001, South Africa; melendhra.pillay@nhls.ac.za (M.P.)

<sup>7</sup> Hamdi Mango Center for Scientific Research, The University of Jordan, 11942 Amman, Jordan; abuirmailehbashaer@yahoo.com (B.A.-I.); bustanjiyasser@gmail.com (Y.B.)

<sup>8</sup> Department of Basic Medical Sciences, College of Medicine, University of Sharjah, Sharjah 27272, UAE

<sup>9</sup> Department of Medicinal Chemistry, National Institute of Pharmaceutical Education and Research (NIPER-R) Raebareli, Lucknow UP 226002, India; c.sandeep@niperraebareli.edu.in (S.C.)

<sup>10</sup> Department of Pharmaceutics, Vidya Siri College of Pharmacy, Off Sarjapura Road, Bangalore 560035, India

<sup>11</sup> Department of Biomedical Sciences, College of Clinical Pharmacy, King Faisal University, Al-Ahsa 31982, Saudi Arabia; spottathail@kfu.edu.sa (P.S.)

<sup>12</sup> Department of Biomedical Sciences, College of Veterinary Medicine, King Faisal University, Al-Ahsa 31982, Saudi Arabia; mkandeel@kfu.edu.sa (M.K.)

<sup>13</sup> Department of Pharmacology, Faculty of Veterinary Medicine, Kafrelsheikh University, Kafrelsheikh 33516, Egypt

<sup>14</sup> Department of Public Health Medicine, Howard College Campus, University of KwaZulu-Natal, Durban 4001, South Africa; rashmivenugopala@gmail.com (R.V.)

<sup>15</sup> Department of Pharmacology, Faculty of Medicine, Minia University, El-Minia 61511, Egypt

\* Correspondence: kvenugopala@kfu.edu.sa (K.N.V.); prankishore1@gmail.com (P.K.D.)

## Table of contents

| Sl. No. | Particulars                                                                                                                                                  | Page Number |
|---------|--------------------------------------------------------------------------------------------------------------------------------------------------------------|-------------|
| 01      | <b>Scheme S1.</b> Synthetic scheme, procedure, characterization details of 2-(5-bromo-2-fluorophenyl)-2,3-dihydroquinazolin-4(1 <i>H</i> )-one ( <b>3l</b> ) | 3           |
| 02      | <b>Figure S1:</b> FT-IR of 2-(5-bromo-2-fluorophenyl)-2,3-dihydroquinazolin-4(1 <i>H</i> )-one ( <b>3l</b> )                                                 | 4           |
| 03      | <b>Figure S2:</b> <sup>1</sup> H-NMR of 2-(5-bromo-2-fluorophenyl)-2,3-dihydroquinazolin-4(1 <i>H</i> )-one ( <b>3l</b> )                                    | 5           |
| 04      | <b>Figure S3:</b> <sup>13</sup> C-NMR of 2-(5-bromo-2-fluorophenyl)-2,3-dihydroquinazolin-4(1 <i>H</i> )-one ( <b>3l</b> )                                   | 6           |
| 05      | <b>Table S1:</b> Reported essential and potential mycobacterial drug targets.                                                                                | 7           |
| 06      | <b>Table S2:</b> The selected 20 essential mycobacterial drug targets that we used for molecular modeling studies.                                           | 9           |
| 07      | References                                                                                                                                                   | 9           |

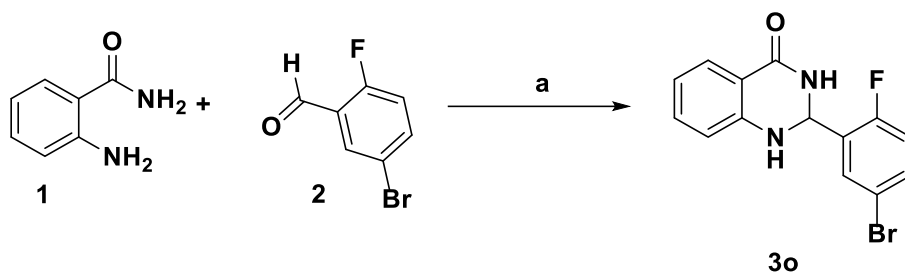

**Scheme S1.** Synthetic scheme for the preparation of 2-(5-bromo-2-fluorophenyl)-2,3-dihydroquinazolin-4(1H)-one (**3l**). Reagents and conditions: (a) graphene oxide (2.5%), water, stirred at room temperature; yield 82%–95%.

### Synthetic procedure for 2-(5-bromo-2-fluorophenyl)-2,3-dihydroquinazolin-4(1H)-one (**3l**)

A mixture of 5-bromo-2-fluorobenzaldehyde (1.5 mmol) and 2-aminobenzamide (1 mmol) in 10 mL of water was stirred in a round-bottom flask with graphene oxide (2.5%) at room temperature, as depicted in Scheme S1. The progress of the reaction was monitored with TLC. After completion of the reaction, the insoluble precipitate obtained was separated and filtrated, and the crude product was washed with 50% cold ethanol. The crude product was recrystallized from 75% ethyl alcohol to obtain 65% of the title compound 2-(4-fluorophenyl)-2,3-dihydroquinazolin-4(1H)-one at 98% purity.

FT-IR (KBr,  $\text{cm}^{-1}$ ) 3303, 3232, 3195, 3076, 2920, 1650, 1612, 1512, 1477, 1396, 1251, 1157, 821, 750.  $^1\text{H-NMR}$  (400 MHz,  $\text{DMSO-}d_6$ )  $\delta$  = 8.45 (1H, s), 7.83–7.81 (1H, m), 7.66–7.59 (2H, m), 7.30–7.13 (3H, m), 6.84–6.71 (2H, m), 6.05 (1H, s);  $^{13}\text{C-NMR}$  (100 MHz,  $\text{DMSO-}d_6$ )  $\delta$  = 164.56, 158.36, 157.78, 147.37, 134.55, 133.55, 133.23, 131.05, 130.58, 126.44, 118.72, 118.13, 116.00, 115.48, 114.46. Anal. calculated for  $\text{C}_{14}\text{H}_{10}\text{BrFN}_2\text{O}$ : C, 52.36; H, 3.14; N, 8.72; found C, 52.27, H, 3.19; N, 8.68.

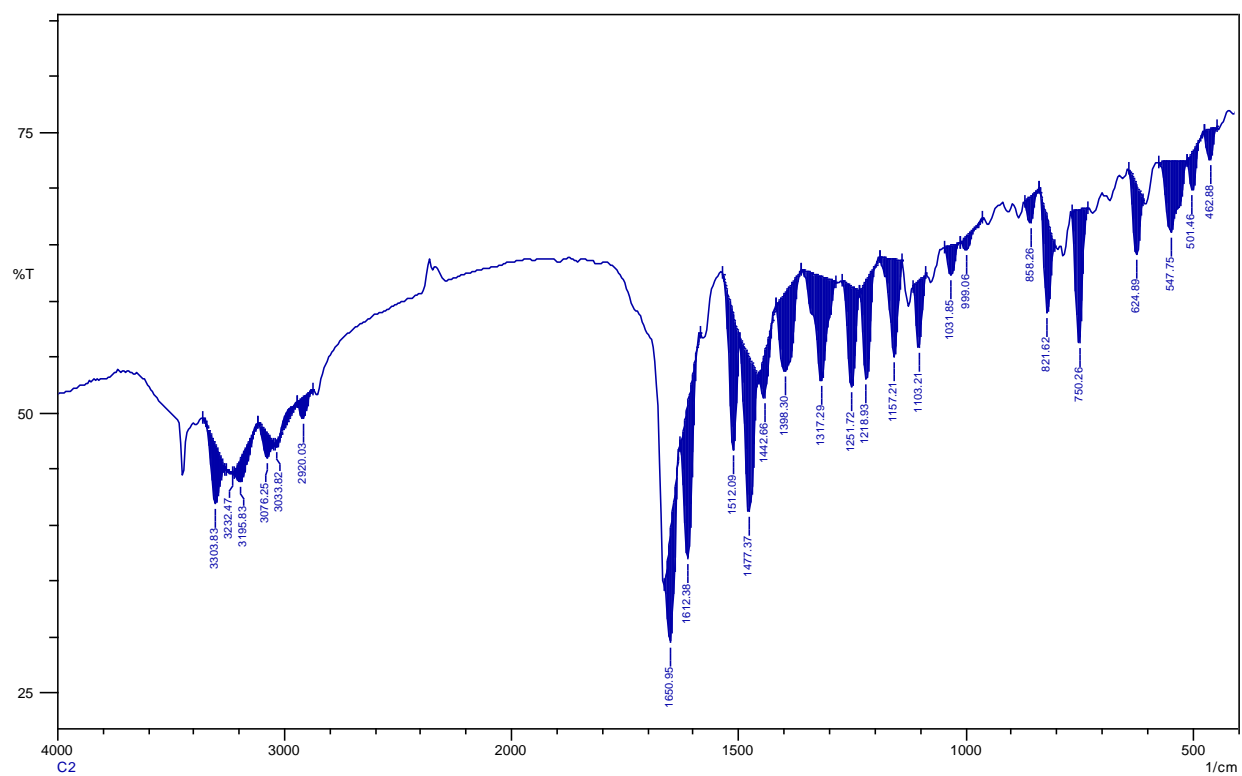

**Figure S1:** FTIR of 2-(5-Bromo-2-fluorophenyl)-2,3-dihydroquinazolin-4(1H)-one (31)

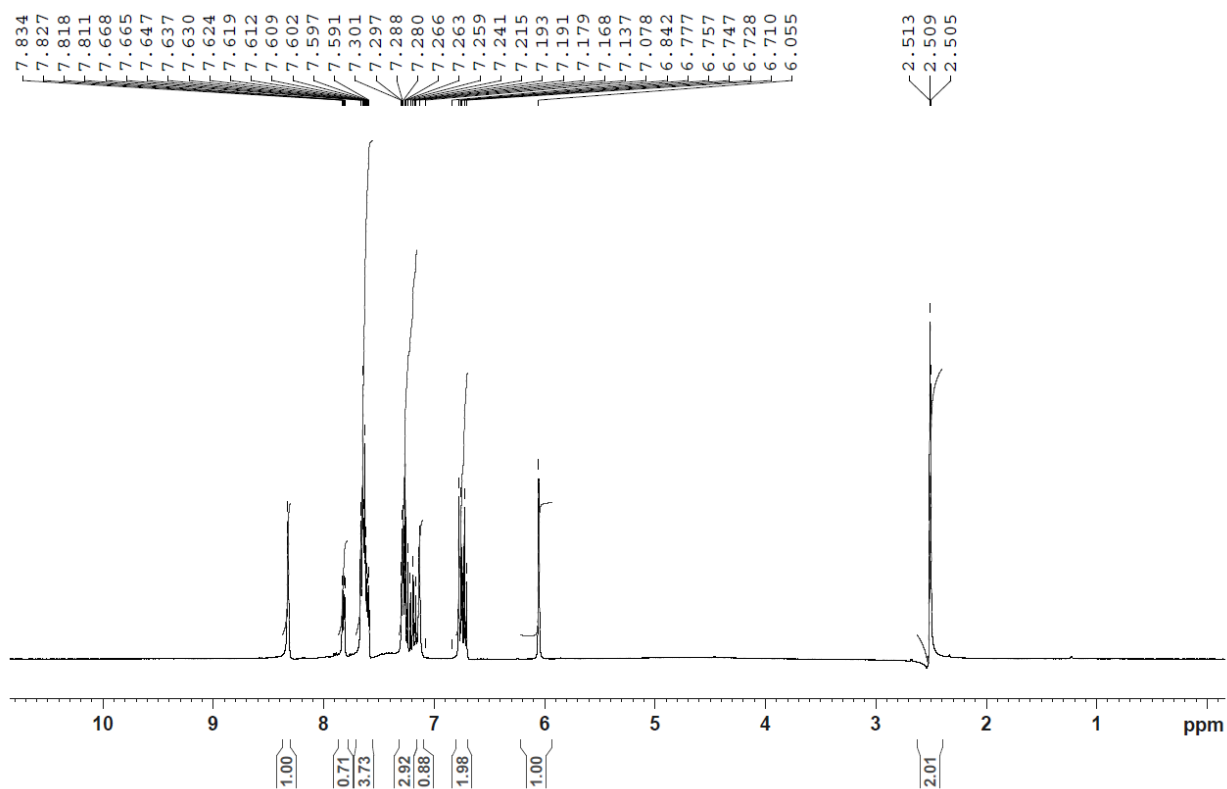

**Figure S2:** <sup>1</sup>H-NMR of 2-(5-bromo-2-fluorophenyl)-2,3-dihydroquinazolin-4(1H)-one (3l)

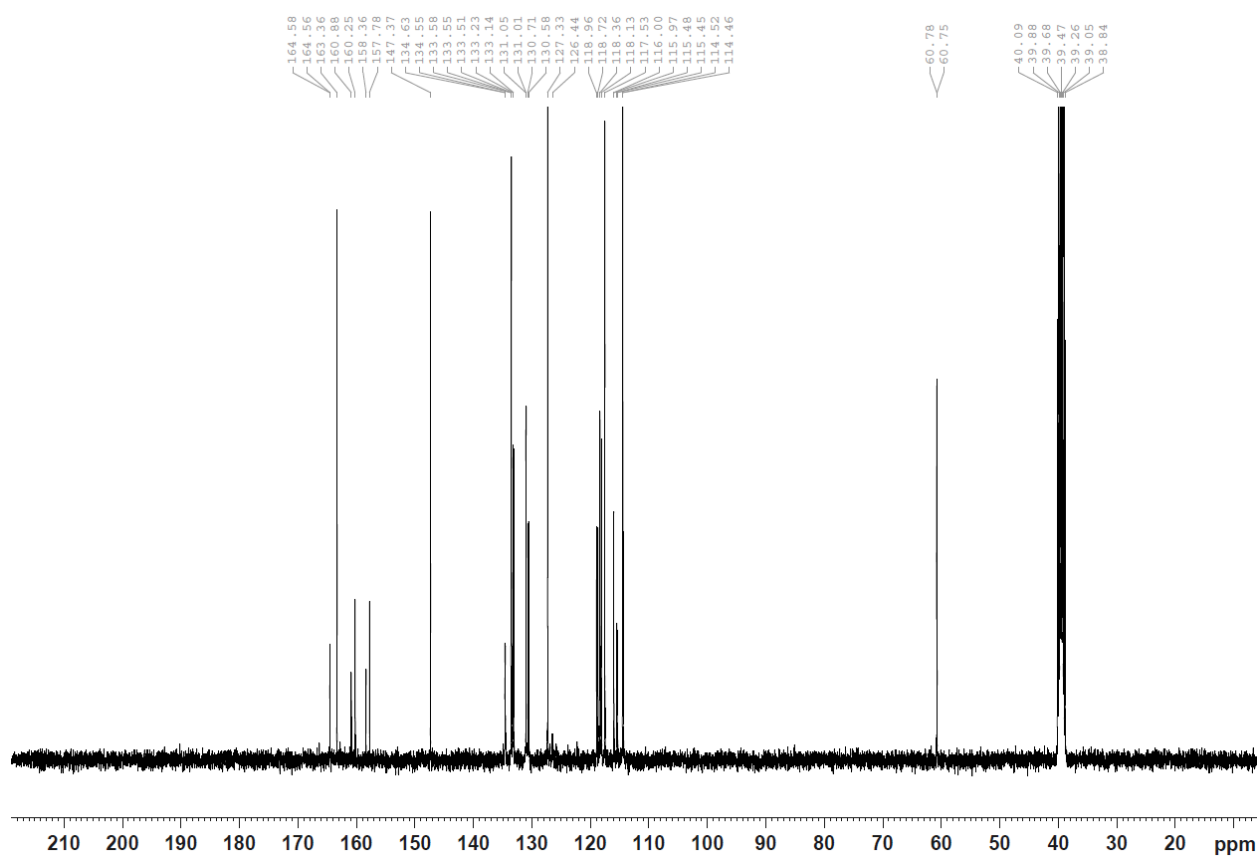

**Figure S3:** <sup>13</sup>C-NMR of 2-(5-bromo-2-fluorophenyl)-2,3-dihydroquinazolin-4(1H)-one (3l)

**Table S1:** Reported essential and potential mycobacterial drug targets.

| Index | MTB Protein Target                                                   | Targeted pathway                                          | Availability of 3D structure | References |
|-------|----------------------------------------------------------------------|-----------------------------------------------------------|------------------------------|------------|
| 1     | Decaprenylphosphoryl- $\beta$ -d-ribofuranose oxidoreductase (DprE1) | Cell wall synthesis: arabinogalactan biosynthesis         | Yes                          | [1-3]      |
| 2     | Enoyl-ACP-reductase, (InhA)                                          | Cell wall synthesis: mycolic acid biosynthesis            | Yes                          | [4]        |
| 3     | Mycolic acid cyclopropane synthase (CmaA2)                           | Cell wall synthesis: mycolic acid biosynthesis            | Yes                          | [5]        |
| 4     | Alanine racemase (alr)                                               | Cell wall biosynthesis: peptidoglycan biosynthesis        | Yes                          | [6]        |
| 5     | 3-oxoacyl-[acyl-carrier-protein] synthase 3 (FabH)                   | Fatty acid biosynthesis                                   | Yes                          | [7]        |
| 6     | $\beta$ -ketoacyl-ACP reductase (MabA)                               | Fatty Acid Biosynthesis                                   | Yes                          | [8]        |
| 7     | Aspartyl-tRNA Synthetase (AspS)                                      | Protein synthesis                                         | Yes                          | [9]        |
| 8     | leucyl-tRNA synthase (LeuRS)                                         | Protein synthesis                                         | Yes                          | [10]       |
| 9     | Bifunctional enzyme (GlmU)                                           | Cell wall biosynthesis                                    | Yes                          | [11]       |
| 10    | Pantothenate kinase (PanK, type 1)                                   | Cofactor biosynthesis: Coenzyme A biosynthesis            | Yes                          | [12]       |
| 11    | Protein kinase B (PknB)                                              | Signal transduction                                       | Yes                          | [13]       |
| 12    | Protein kinase A (PknA)                                              | Signal transduction                                       | Yes                          | [14]       |
| 13    | $\beta$ -ketoacyl acyl carrier protein synthase I (KasA)             | Cell wall synthesis: mycolic acid biosynthesis            | Yes                          | [7]        |
| 14    | Polyketide synthase (Pks13)                                          | Cell wall synthesis: mycolic acid biosynthesis            | Yes                          | [15, 16]   |
| 15    | 5'-pyridoxal phosphate (PLP)-dependent aminotransferase (BioA)       | Cofactor biosynthesis: biotin biosynthesis                | Yes                          | [17]       |
| 16    | Aspartate aminotransferase (aspAT)                                   | Asp biosynthesis, and Asp-dependent nitrogen metabolism   | Yes                          | [18]       |
| 17    | Enoyl-CoA hydratase 6 (EchA6)                                        | Cell wall synthesis: mycolic acid biosynthesis            | Yes                          | [19]       |
| 18    | Transcriptional repressor of EthA monooxygenase (EthR)               | Cell wall synthesis: mycolic acid biosynthesis (indirect) | Yes                          | [20]       |
| 19    | MurE (Mur Ligase family)                                             | Cell wall biosynthesis: peptidoglycan biosynthesis        | Yes                          | [21]       |
| 20    | 2-methylcitrate synthase (PrpC) or (GltA3)                           | Fatty Acid Biosynthesis                                   | Yes                          | [22]       |
| 21    | Transmembrane transport protein large (MmpL3)                        | Cell wall synthesis: mycolic acid biosynthesis            | Yes                          | [2]        |
| 22    | CTP synthetase (PyrG)                                                | DNA synthesis                                             | Yes                          | [23]       |
| 23    | 3-oxoacyl-(Acyl-carrier-protein) reductase FabG4 (FabG-1)            | Fatty Acid Biosynthesis                                   | Yes                          | [24]       |
| 24    | Triosephosphate isomerase (TpiA)                                     | Gluconeogenic pathways                                    | Yes                          | [25]       |
| 25    | Serine hydroxymethyltransferase 1 (GlyA1)                            | Tetrahydrofolate interconversion                          | Yes                          | [26]       |
| 26    | Glycine cleavage system H protein (gcvH)                             | Degradation of glycine                                    | Yes                          | [24]       |
| 27    | 6-phosphogluconolactonase (pgl) or (devB)                            | Carbohydrate degradation                                  | Yes                          | [24]       |
| 28    | O-succinylhomoserine sulfhydrylase (metZ)                            | Amino-acid biosynthesis                                   | Yes                          | [24]       |

|    |                                                                   |                                                    |                 |          |
|----|-------------------------------------------------------------------|----------------------------------------------------|-----------------|----------|
| 29 | S-adenosylmethionine synthetase (metK)                            | Amino-acid biosynthesis                            | Yes             | [24]     |
| 30 | Thymidylate synthase (ThyX)                                       | Pyrimidine metabolism                              | Yes             | [27]     |
| 31 | steroid-degrading 9lavin monooxygenase (HsaA) and (HsaB)          | Cholesterol metabolism                             | Yes             | [22]     |
| 32 | phosphatidyl-myoinositol mannosyltransferase (PimA)               | Cell wall synthesis                                | No, M. seg.     | [28]     |
| 33 | DNA topoisomerases and DNA gyrase                                 | DNA replication                                    | Yes             | [29]     |
| 34 | Malate synthase (GlcB)                                            | Fatty acid metabolism: The glyoxylate shunt        | Yes             | [30]     |
| 35 | D-alanine:D-alanine Ligase                                        | Cell wall biosynthesis: peptidoglycan biosynthesis | Yes             | [31]     |
| 36 | Arabinosyltransferase C, A, and B (embC); (embA); (embB)          | Cell wall synthesis: arabinogalactan biosynthesis  | Yes             | [32, 33] |
| 37 | Phospho-N-acetylmuramoyl-pentapeptide-transferase (mraY)          | Cell wall biosynthesis: peptidoglycan biosynthesis | No              | [32]     |
| 38 | ESX-3 secretion system ATPase (EccB3)                             | ESX-3 specialized secretion system                 | No, M. seg.     | [15]     |
| 39 | 1,4-dihydroxy-2-naphthoate octaprenyltransferase (MenA)           | Energy metabolism                                  | No              | [7]      |
| 40 | Demethylmenaquinone methyltransferase (MenG)                      | Energy metabolism                                  | No              | [7]      |
| 41 | MoeW                                                              | Cofactor biosynthesis: molybdenum biosynthetic     | No              | [1]      |
| 43 | Cytochrome b subunit of the cytochrome bc1 complex (QcrB)         | Energy metabolism and ATP synthesis                | No              | [2]      |
| 44 | Acid resistance periplasmic serine protease (MarP)                | Intracellular pH homeostasis                       | No              | [10]     |
| 45 | Decaprenyl-phosphate N-acetylglucosaminephosphotransferase (wecA) | Cell wall synthesis: arabinogalactan biosynthesis  | No              | [34]     |
| 46 | 50S ribosomal protein L3 (rplC)                                   | Protein synthesis                                  | No              | [32]     |
| 47 | ATP synthase (atpE)                                               | Energy metabolism                                  | Yes, rotor ring | [2]      |
| 48 | Dihydrofolate reductase (dfrA)                                    | DNA precursor synthesis                            | Yes             | [10, 35] |



**Table S2:** The selected 20 essential mycobacterial drug targets that we used for molecular modeling studies.

| Index | MTB Protein Target                                                   | Targeted pathway                                             | PDB ID               | References |
|-------|----------------------------------------------------------------------|--------------------------------------------------------------|----------------------|------------|
| 1     | Decaprenylphosphoryl- $\beta$ -d-ribofuranose oxidoreductase (DprE1) | Cell wall biosynthesis: arabinogalactan biosynthesis         | <a href="#">4P8C</a> | [1-3]      |
| 2     | Enoyl-ACP-reductase, (InhA)                                          | Cell wall biosynthesis: mycolic acid biosynthesis            | <a href="#">6R9W</a> | [4]        |
| 3     | Mycolic acid cyclopropane synthase (CmaA2)                           | Cell wall biosynthesis: mycolic acid biosynthesis            | <a href="#">1KPI</a> | [5]        |
| 4     | $\beta$ -ketoacyl acyl carrier protein synthase I (KasA)             | Cell wall biosynthesis: mycolic acid biosynthesis            | <a href="#">6P9L</a> | [7]        |
| 5     | Polyketide synthase (Pks13)                                          | Cell wall biosynthesis: mycolic acid biosynthesis            | <a href="#">5V3Y</a> | [15, 16]   |
| 6     | Enoyl-CoA hydratase 6 (EchA6)                                        | Cell wall biosynthesis: mycolic acid biosynthesis            | <a href="#">5DUF</a> | [19]       |
| 7     | Transcriptional repressor of EthA monooxygenase (EthR)               | Cell wall biosynthesis: mycolic acid biosynthesis (indirect) | <a href="#">5EYR</a> | [20]       |
| 8     | Alanine racemase (alr)                                               | Cell wall biosynthesis: peptidoglycan biosynthesis           | <a href="#">1XFC</a> | [6]        |
| 9     | MurE (Mur Ligase family)                                             | Cell wall biosynthesis: peptidoglycan biosynthesis           | <a href="#">2WTZ</a> | [21]       |
| 10    | Bifunctional enzyme (GlmU)                                           | Cell wall biosynthesis                                       | <a href="#">2QKX</a> | [11]       |
| 11    | 2-methylcitrate synthase (PrpC) or (GltA3)                           | Fatty Acid Biosynthesis                                      | <a href="#">3HWK</a> | [22]       |
| 12    | 3-oxoacyl-[acyl-carrier-protein] synthase 3 (FabH)                   | Fatty acid biosynthesis                                      | <a href="#">1HZP</a> | [7]        |
| 13    | $\beta$ -ketoacyl-ACP reductase (MabA)                               | Fatty Acid Biosynthesis                                      | <a href="#">1UZN</a> | [8]        |
| 14    | Aspartyl-tRNA Synthetase (AspS)                                      | Protein synthesis                                            | <a href="#">5W25</a> | [9]        |
| 15    | leucyl-tRNA synthase (LeuRS)                                         | Protein synthesis                                            | <a href="#">5AGS</a> | [10]       |
| 16    | Protein kinase B (PknB)                                              | Signal transduction                                          | <a href="#">5U94</a> | [13]       |
| 17    | Protein kinase A (PknA)                                              | Signal transduction                                          | <a href="#">6B2Q</a> | [14]       |

|    |                                                                |                                                         |                      |      |
|----|----------------------------------------------------------------|---------------------------------------------------------|----------------------|------|
| 18 | Pantothenate kinase (PanK, type 1)                             | Cofactor biosynthesis: Coenzyme A biosynthesis          | <a href="#">4BFZ</a> | [12] |
| 19 | 5'-pyridoxal phosphate (PLP)-dependent aminotransferase (BioA) | Cofactor biosynthesis: biotin biosynthesis              | <a href="#">4XJO</a> | [17] |
| 20 | Aspartate aminotransferase (aspAT)                             | Asp biosynthesis, and Asp-dependent nitrogen metabolism | <a href="#">6U7A</a> | [18] |
| 21 | Transmembrane transport protein large (MmpL3)                  | Cell wall synthesis: mycolic acid biosynthesis          | <a href="#">6AJJ</a> | [2]  |

## References

1. Wang, F., et al., *Identification of a small molecule with activity against drug-resistant and persistent tuberculosis*. Proceedings of the National Academy of Sciences, 2013. **110**(27): p. E2510-E2517.DOI: <http://doi.org/10.1073/pnas.1309171110>.
2. Torfs, E., et al., *Opportunities for Overcoming Mycobacterium tuberculosis Drug Resistance: Emerging Mycobacterial Targets and Host-Directed Therapy*. International journal of molecular sciences, 2019. **20**(12): p. 2868.DOI: <http://doi.org/10.3390/ijms20122868>.
3. Piton, J., C.S.Y. Foo, and S.T. Cole, *Structural studies of Mycobacterium tuberculosis DprE1 interacting with its inhibitors*. Drug Discovery Today, 2017. **22**(3): p. 526-533.DOI: <http://doi.org/10.1016/j.drudis.2016.09.014>.
4. Kamsri, P., et al., *Discovery of New and Potent InhA Inhibitors as Antituberculosis Agents: Structure-Based Virtual Screening Validated by Biological Assays and X-ray Crystallography*. Journal of Chemical Information and Modeling, 2020. **60**(1): p. 226-234.DOI: <http://doi.org/10.1021/acs.jcim.9b00918>.
5. Huang, C.-c., et al., *Crystal Structures of Mycolic Acid Cyclopropane Synthases from Mycobacterium tuberculosis*. Journal of Biological Chemistry, 2002. **277**(13): p. 11559-11569.DOI: <http://doi.org/10.1074/jbc.M111698200>.
6. LeMagueres, P., et al., *The 1.9 Å Crystal Structure of Alanine Racemase from Mycobacterium tuberculosis Contains a Conserved Entryway into the Active Site*. Biochemistry, 2005. **44**(5): p. 1471-1481.DOI: <http://doi.org/10.1021/bi0486583>.
7. Shetye, G.S., S.G. Franzblau, and S. Cho, *New tuberculosis drug targets, their inhibitors, and potential therapeutic impact*. Translational Research, 2020. **220**: p. 68-97.DOI: <http://doi.org/10.1016/j.trsl.2020.03.007>.
8. Cohen-Gonsaud, M., et al., *Crystal Structure of MabA from Mycobacterium tuberculosis, a Reductase involved in Long-chain Fatty Acid Biosynthesis*. Journal of Molecular Biology, 2002. **320**(2): p. 249-261.DOI: [http://doi.org/10.1016/S0022-2836\(02\)00463-1](http://doi.org/10.1016/S0022-2836(02)00463-1).
9. Gurucha, S.S., et al., *Biochemical and structural characterization of mycobacterial aspartyl-tRNA synthetase AspS, a promising TB drug target*. PloS one, 2014. **9**(11): p. e113568-e113568.DOI: <http://doi.org/10.1371/journal.pone.0113568>.
10. Yuan, T. and N.S. Sampson, *Hit Generation in TB Drug Discovery: From Genome to Granuloma*. Chemical Reviews, 2018. **118**(4): p. 1887-1916.DOI: <http://doi.org/10.1021/acs.chemrev.7b00602>.
11. Chen, C., et al., *The Inhibitory Effect of GlmU Acetyltransferase Inhibitor TPSA on Mycobacterium tuberculosis May Be Affected Due to Its Methylation by Methyltransferase Rv0560c*. Frontiers in Cellular and Infection Microbiology, 2019. **9**(251).DOI: <http://doi.org/10.3389/fcimb.2019.00251>.

12. Chiarelli, L.R., et al., *A multitarget approach to drug discovery inhibiting Mycobacterium tuberculosis PyrG and PanK*. Scientific Reports, 2018. 8(1): p. 3187.DOI: <http://doi.org/10.1038/s41598-018-21614-4>.
13. Wlodarchak, N., et al., *In Silico Screen and Structural Analysis Identifies Bacterial Kinase Inhibitors which Act with  $\beta$ -Lactams To Inhibit Mycobacterial Growth*. Molecular Pharmaceutics, 2018. 15(11): p. 5410-5426.DOI: <http://doi.org/10.1021/acs.molpharmaceut.8b00905>.
14. Kang, C.-M., et al., *The Mycobacterium tuberculosis serine/threonine kinases PknA and PknB: substrate identification and regulation of cell shape*. Genes & Development, 2005. 19(14): p. 1692-1704.DOI: <http://doi.org/10.1101/gad.1311105>.
15. Ioerger, T.R., et al., *Identification of New Drug Targets and Resistance Mechanisms in Mycobacterium tuberculosis*. PLOS ONE, 2013. 8(9): p. e75245.DOI: <http://doi.org/10.1371/journal.pone.0075245>.
16. Aggarwal, A., et al., *Development of a Novel Lead that Targets M. tuberculosis Polyketide Synthase* 13. Cell, 2017. 170(2): p. 249-259.e25.DOI: <http://doi.org/10.1016/j.cell.2017.06.025>.
17. Liu, F., et al., *Structure-Based Optimization of Pyridoxal 5'-Phosphate-Dependent Transaminase Enzyme (BioA) Inhibitors that Target Biotin Biosynthesis in Mycobacterium tuberculosis*. Journal of Medicinal Chemistry, 2017. 60(13): p. 5507-5520.DOI: <http://doi.org/10.1021/acs.jmedchem.7b00189>.
18. Jansen, R.S., et al., *Aspartate aminotransferase Rv3722c governs aspartate-dependent nitrogen metabolism in Mycobacterium tuberculosis*. Nature Communications, 2020. 11(1): p. 1960.DOI: <http://doi.org/10.1038/s41467-020-15876-8>.
19. Cox, J.A.G., et al., *THPP target assignment reveals EchA6 as an essential fatty acid shuttle in mycobacteria*. Nature Microbiology, 2016. 1(2): p. 15006.DOI: <http://doi.org/10.1038/nmicrobiol.2015.6>.
20. Willand, N., et al., *Synthetic EthR inhibitors boost antituberculous activity of ethionamide*. Nature Medicine, 2009. 15(5): p. 537-544.DOI: <http://doi.org/10.1038/nm.1950>.
21. Munshi, T., et al., *Characterisation of ATP-Dependent Mur Ligases Involved in the Biogenesis of Cell Wall Peptidoglycan in Mycobacterium tuberculosis*. PLOS ONE, 2013. 8(3): p. e60143.DOI: <http://doi.org/10.1371/journal.pone.0060143>.
22. VanderVen, B.C., et al., *Novel Inhibitors of Cholesterol Degradation in Mycobacterium tuberculosis Reveal How the Bacterium's Metabolism Is Constrained by the Intracellular Environment*. PLOS Pathogens, 2015. 11(2): p. e1004679.DOI: <http://doi.org/10.1371/journal.ppat.1004679>.
23. Mori, G., et al., *Thiophenecarboxamide Derivatives Activated by EthA Kill Mycobacterium tuberculosis by Inhibiting the CTP Synthetase PyrG*. Chemistry & Biology, 2015. 22(7): p. 917-927.DOI: <http://doi.org/10.1016/j.chembiol.2015.05.016>.
24. Baugh, L., et al., *Increasing the structural coverage of tuberculosis drug targets*. Tuberculosis, 2015. 95(2): p. 142-148.DOI: <http://doi.org/10.1016/j.tube.2014.12.003>.
25. Connor, S.E., et al., *Structural and functional characterization of Mycobacterium tuberculosis triosephosphate isomerase*. Acta Crystallographica Section D, 2011. 67(12): p. 1017-1022.DOI: <http://doi.org/doi:10.1107/S0907444911042971>.
26. Chaturvedi, S. and V. Bhakuni, *Unusual Structural, Functional, and Stability Properties of Serine Hydroxymethyltransferase from Mycobacterium tuberculosis*. Journal of Biological Chemistry, 2003. 278(42): p. 40793-40805.DOI: <http://doi.org/10.1074/jbc.M306192200>.

27. Fivian-Hughes, A.S., J. Houghton, and E.O. Davis, *Mycobacterium tuberculosis* thymidylate synthase gene *thyX* is essential and potentially bifunctional, while *thyA* deletion confers resistance to p-aminosalicylic acid. *Microbiology*, 2012. **158**(2): p. 308-318.DOI: <http://doi.org/10.1099/mic.0.053983-0>.
28. Singh, V. and V. Mizrahi, *Identification and validation of novel drug targets in Mycobacterium tuberculosis*. *Drug Discovery Today*, 2017. **22**(3): p. 503-509.DOI: <http://doi.org/10.1016/j.drudis.2016.09.010>.
29. Fu, G., et al., *Crystal structure of DNA gyrase B' domain sheds lights on the mechanism for T-segment navigation*. *Nucleic Acids Research*, 2009. **37**(17): p. 5908-5916.DOI: <http://doi.org/10.1093/nar/gkp586>.
30. Krieger, Inna V., et al., *Structure-Guided Discovery of Phenyl-diketo Acids as Potent Inhibitors of M. tuberculosis Malate Synthase*. *Chemistry & Biology*, 2012. **19**(12): p. 1556-1567.DOI: <http://doi.org/10.1016/j.chembiol.2012.09.018>.
31. Bruning, J.B., et al., *Structure of the Mycobacterium tuberculosis D-Alanine:D-Alanine Ligase, a Target of the Antituberculosis Drug D-Cycloserine*. *Antimicrobial Agents and Chemotherapy*, 2011. **55**(1): p. 291-301.DOI: <http://doi.org/10.1128/aac.00558-10>.
32. Sundaramurthi, J.C., et al., *TBDRUGS – Database of drugs for tuberculosis*. *Tuberculosis*, 2016. **100**: p. 69-71.DOI: <http://doi.org/10.1016/j.tube.2016.06.006>.
33. Goude, R., et al., *The Critical Role of embC in Mycobacterium tuberculosis*. *Journal of Bacteriology*, 2008. **190**(12): p. 4335-4341.DOI: <http://doi.org/10.1128/jb.01825-07>.
34. Huszár, S., et al., *N-Acetylglucosamine-1-Phosphate Transferase, WecA, as a Validated Drug Target in Mycobacterium tuberculosis*. *Antimicrobial agents and chemotherapy*, 2017. **61**(11): p. e01310-17.DOI: <http://doi.org/10.1128/aac.01310-17>.
35. Venugopala, K.N., et al., *Anti-Tubercular Properties of 4-Amino-5-(4-Fluoro-3-Phenoxyphenyl)-4H-1,2,4-Triazole-3-Thiol and Its Schiff Bases: Computational Input and Molecular Dynamics*. *Antibiotics*, 2020. **9**(9): p. 559.
